# Supplementary material
Source: Springer Nature journal article supplement (https://www.springermedizin.de/resource/supplementary/12974_2007_107_MOESM6_ESM.pdf/9600786)

## A. Synaptophysin

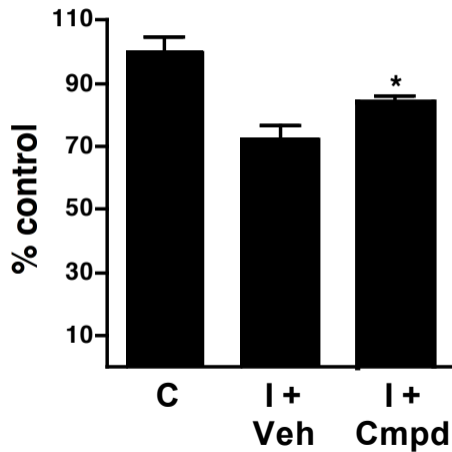

## B. Y-maze

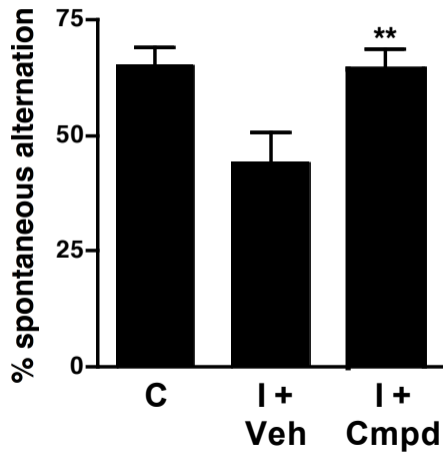

Supplement: MOESM6 [file 9600786]
